# Supplementary material for: Origin of Disseminated Gold-Sulfide Mineralization from Proximal Alteration in Orogenic Gold Deposits in the Central Sector of the Yana–Kolyma Metallogenic Belt, NE Russia
Source: MDPI journal article supplement (doi:10.3390/min13030394), 2023-03-11
Supplement: s1 [file s1]

## Supplementary Table S2.

Compositions (wt%) for arsenopyrite in the proximal rock OGD Central YKMB, analyzed by EPMA.

| №                                                                  | Sample   | Fe    | S     | As    | Co   | Ni   | Cu   | Sb   | Σ content<br>of trace<br>elements | Fe/(S+As) | As/S |
|--------------------------------------------------------------------|----------|-------|-------|-------|------|------|------|------|-----------------------------------|-----------|------|
| Hydrothermal Apy1 of the of sediment-hosted orogenic gold deposits |          |       |       |       |      |      |      |      |                                   |           |      |
| <i>Deposit Malo-Taryn, n=35</i>                                    |          |       |       |       |      |      |      |      |                                   |           |      |
| 1                                                                  | MT-87-22 | 34.99 | 19.79 | 45.04 | 0.03 | 0.01 | 0.02 | 0.12 | 0.18                              | 0.51      | 0.97 |
| 2                                                                  | MT-87-22 | 34.49 | 19.09 | 45.74 | 0.22 | 0.20 | 0.03 | 0.24 | 0.69                              | 0.51      | 1.03 |
| 3                                                                  | MT-87-22 | 34.61 | 19.83 | 45.08 | 0.12 | 0.17 | 0.04 | 0.15 | 0.48                              | 0.51      | 0.97 |
| 4                                                                  | MT-87-22 | 35.03 | 19.98 | 44.62 | 0.03 | 0.08 | 0.01 | 0.24 | 0.36                              | 0.51      | 0.96 |
| 5                                                                  | MT-87-22 | 34.62 | 18.98 | 45.58 | 0.27 | 0.10 | bdl  | 0.45 | 0.82                              | 0.52      | 1.03 |
| 6                                                                  | MB-9-16  | 34.42 | 20.73 | 44.72 | 0.02 | bdl  | bdl  | 0.11 | 0.13                              | 0.50      | 0.92 |
| 7                                                                  | MB-9-16  | 34.92 | 20.64 | 44.31 | 0.04 | bdl  | bdl  | 0.10 | 0.14                              | 0.51      | 0.92 |
| 8                                                                  | MB-9-16  | 34.42 | 20.38 | 44.87 | 0.16 | 0.01 | bdl  | 0.16 | 0.33                              | 0.50      | 0.94 |
| 9                                                                  | MB-9-16  | 34.41 | 20.53 | 44.88 | 0.10 | bdl  | bdl  | 0.08 | 0.18                              | 0.50      | 0.94 |
| 10                                                                 | MB-9-16  | 34.14 | 20.40 | 45.35 | 0.05 | 0.01 | bdl  | 0.05 | 0.10                              | 0.49      | 0.95 |
| 11                                                                 | MB-9-16  | 34.37 | 20.30 | 45.26 | 0.03 | bdl  | bdl  | 0.05 | 0.08                              | 0.50      | 0.95 |
| 12                                                                 | MB-9-16  | 34.54 | 20.12 | 45.24 | 0.05 | bdl  | bdl  | 0.04 | 0.09                              | 0.50      | 0.96 |
| 13                                                                 | MB-9-16  | 34.45 | 20.27 | 45.25 | 0.03 | bdl  | bdl  | bdl  | 0.03                              | 0.50      | 0.96 |
| 14                                                                 | MB-9-16  | 34.44 | 20.23 | 45.30 | 0.01 | bdl  | bdl  | 0.02 | 0.03                              | 0.50      | 0.96 |
| 15                                                                 | MB-9-16  | 34.39 | 20.09 | 45.51 | 0.02 | bdl  | bdl  | bdl  | 0.02                              | 0.50      | 0.97 |
| 16                                                                 | MB-9-16  | 34.24 | 20.34 | 45.39 | 0.02 | bdl  | bdl  | bdl  | 0.02                              | 0.49      | 0.96 |
| 17                                                                 | MB-9-16  | 34.92 | 20.64 | 44.31 | 0.04 | bdl  | bdl  | 0.10 | 0.14                              | 0.51      | 0.92 |
| 18                                                                 | MB-9-16  | 34.25 | 20.47 | 45.14 | 0.04 | bdl  | bdl  | 0.11 | 0.14                              | 0.49      | 0.94 |
| 19                                                                 | MB-9-16  | 34.42 | 20.38 | 44.87 | 0.16 | 0.01 | bdl  | 0.16 | 0.33                              | 0.50      | 0.94 |
| 20                                                                 | MB-9-16  | 34.46 | 20.55 | 44.84 | 0.03 | bdl  | bdl  | 0.12 | 0.15                              | 0.50      | 0.93 |
| 21                                                                 | MB-9-16  | 34.41 | 20.53 | 44.88 | 0.10 | bdl  | bdl  | 0.08 | 0.18                              | 0.50      | 0.94 |
| 22                                                                 | MB-9-16  | 34.14 | 20.40 | 45.35 | 0.05 | 0.01 | bdl  | 0.05 | 0.10                              | 0.49      | 0.95 |
| 23                                                                 | MB-9-16  | 34.54 | 20.12 | 45.24 | 0.05 | bdl  | bdl  | 0.04 | 0.09                              | 0.50      | 0.96 |
| 24                                                                 | MB-9-16  | 34.45 | 20.27 | 45.25 | 0.03 | bdl  | bdl  | bdl  | 0.03                              | 0.50      | 0.96 |
| 25                                                                 | MT-70-16 | 34.34 | 20.76 | 44.57 | 0.05 | 0.01 | bdl  | 0.27 | 0.33                              | 0.49      | 0.92 |
| 26                                                                 | MT-70-16 | 34.15 | 19.99 | 45.57 | 0.04 | 0.01 | bdl  | 0.24 | 0.29                              | 0.50      | 0.98 |
| 27                                                                 | MT-70-16 | 34.37 | 21.05 | 44.36 | 0.03 | 0.01 | bdl  | 0.18 | 0.29                              | 0.50      | 0.91 |
| 28                                                                 | MT-70-16 | 34.26 | 21.14 | 44.31 | 0.06 | 0.07 | bdl  | 0.17 | 0.18                              | 0.50      | 0.89 |
| 29                                                                 | MT-70-16 | 34.48 | 20.59 | 44.56 | 0.04 | bdl  | bdl  | 0.33 | 0.16                              | 0.49      | 0.91 |

supplementary materials (continued)

| No                             | Sample    | Fe    | S     | As    | Co   | Ni   | Cu   | Sb   | Σ content<br>of trace<br>elements | Fe/(S+As) | As/S |
|--------------------------------|-----------|-------|-------|-------|------|------|------|------|-----------------------------------|-----------|------|
| 30                             | MT-70-16  | 34.63 | 20.48 | 44.69 | 0.04 | bdl  | bdl  | 0.16 | 0.90                              | 0.49      | 0.84 |
| 31                             | MT-70-16  | 34.45 | 21.56 | 44.16 | 0.18 | 0.24 | bdl  | 0.10 | 0.51                              | 0.49      | 0.88 |
| 32                             | MT-70-16  | 34.42 | 21.08 | 44.42 | 0.03 | 0.01 | bdl  | 0.18 | 0.22                              | 0.49      | 0.90 |
| 33                             | MT-70-16  | 34.41 | 21.23 | 44.5  | 0.06 | 0.07 | bdl  | 0.17 | 0.30                              | 0.49      | 0.90 |
| 34                             | MT-70-16  | 34.48 | 20.59 | 44.56 | 0.04 | bdl  | bdl  | 0.33 | 0.37                              | 0.50      | 0.93 |
| 35                             | MT-70-16  | 34.36 | 20.32 | 44.34 | 0.04 | bdl  | bdl  | 0.16 | 0.20                              | 0.50      | 0.93 |
| <i>Deposit Badran, n=16</i>    |           |       |       |       |      |      |      |      |                                   |           |      |
| 36                             | B-10/2-19 | 33.85 | 20.30 | 45.75 | 0.04 | 0.03 | bdl  | 0.04 | 0.11                              | 0.49      | 0.96 |
| 37                             | B-10/2-19 | 34.13 | 20.84 | 44.85 | 0.07 | 0.04 | 0.01 | 0.06 | 0.18                              | 0.49      | 0.92 |
| 38                             | B-10/2-19 | 33.96 | 19.96 | 45.99 | 0.05 | bdl  | 0.02 | 0.05 | 0.12                              | 0.49      | 0.99 |
| 39                             | B-10/2-19 | 34.11 | 20.32 | 45.38 | 0.08 | 0.09 | 0.01 | 0.02 | 0.20                              | 0.49      | 0.96 |
| 40                             | B-54/2-19 | 34.28 | 21.96 | 43.32 | 0.09 | 0.30 | 0.01 | 0.06 | 0.46                              | 0.49      | 0.84 |
| 41                             | B-54/2-19 | 34.29 | 21.46 | 44.10 | 0.05 | 0.04 | bdl  | 0.05 | 0.14                              | 0.49      | 0.88 |
| 42                             | B-56/2-20 | 34.74 | 22.19 | 42.62 | 0.10 | 0.24 | bdl  | 0.11 | 0.45                              | 0.49      | 0.82 |
| 43                             | B-56/2-20 | 34.76 | 22.68 | 42.46 | 0.04 | 0.04 | bdl  | 0.01 | 0.09                              | 0.49      | 0.80 |
| 44                             | B-56/2-20 | 34.47 | 21.77 | 43.41 | 0.08 | 0.21 | bdl  | 0.07 | 0.36                              | 0.49      | 0.85 |
| 45                             | B-56/2-20 | 34.84 | 22.52 | 42.54 | 0.03 | 0.02 | 0.02 | 0.03 | 0.10                              | 0.49      | 0.81 |
| 46                             | B-56/2-20 | 34.88 | 22.59 | 42.50 | 0.03 | 0.01 | bdl  | bdl  | 0.04                              | 0.49      | 0.81 |
| 47                             | B-40-19   | 34.47 | 23.21 | 41.81 | 0.02 | 0.01 | 0.03 | 0.43 | 0.49                              | 0.48      | 0.77 |
| 48                             | B-40-19   | 34.23 | 22.41 | 43.22 | 0.03 | 0.02 | 0.01 | 0.06 | 0.12                              | 0.48      | 0.83 |
| 49                             | B-40-19   | 34.36 | 22.59 | 42.90 | 0.04 | 0.02 | 0.03 | 0.06 | 0.15                              | 0.48      | 0.81 |
| 50                             | B-40-19   | 34.40 | 22.71 | 42.74 | 0.03 | 0.02 | 0.04 | 0.05 | 0.14                              | 0.48      | 0.81 |
| 51                             | B-40-19   | 34.40 | 22.37 | 42.95 | 0.02 | 0.01 | 0.04 | 0.22 | 0.29                              | 0.48      | 0.82 |
| <i>Deposit Khangalas, n=22</i> |           |       |       |       |      |      |      |      |                                   |           |      |
| 52                             | Kh-52-14  | 34.21 | 21.67 | 44.01 | 0.03 | 0.02 | 0.02 | 0.05 | 0.11                              | 0.48      | 0.87 |
| 53                             | Kh-52-14  | 34.27 | 22.02 | 43.58 | 0.04 | 0.04 | 0.01 | 0.05 | 0.14                              | 0.48      | 0.85 |
| 54                             | Kh-52-14  | 34.46 | 22.04 | 43.33 | 0.03 | 0.01 | bdl  | 0.12 | 0.17                              | 0.49      | 0.84 |
| 55                             | Khg-9-19  | 34.42 | 21.92 | 43.52 | 0.07 | 0.01 | bdl  | 0.05 | 0.14                              | 0.49      | 0.85 |
| 56                             | Khg-9-19  | 34.61 | 21.16 | 44.13 | 0.04 | 0.02 | bdl  | 0.04 | 0.10                              | 0.50      | 0.89 |
| 57                             | Khg-9-19  | 33.75 | 20.78 | 45.36 | 0.06 | 0.02 | bdl  | 0.03 | 0.11                              | 0.48      | 0.93 |
| 58                             | Khg-9-19  | 34.44 | 22.07 | 43.39 | 0.06 | bdl  | bdl  | 0.04 | 0.10                              | 0.49      | 0.84 |
| 59                             | Khg-9-19  | 34.18 | 21.37 | 44.35 | 0.06 | bdl  | 0.01 | 0.03 | 0.10                              | 0.49      | 0.89 |

supplementary materials (continued)

| No                                                                         | Sample       | Fe    | S     | As    | Co   | Ni   | Cu   | Sb    | Σ content<br>of trace<br>elements | Fe/(S+As) | As/S |
|----------------------------------------------------------------------------|--------------|-------|-------|-------|------|------|------|-------|-----------------------------------|-----------|------|
| 60                                                                         | Khg-30-19    | 34.85 | 22.47 | 42.44 | 0.08 | 0.05 | bdl  | 0.11  | 0.24                              | 0.49      | 0.81 |
| 61                                                                         | Khg-30-19    | 34.38 | 20.73 | 44.56 | 0.06 | 0.12 | bdl  | 0.15  | 0.33                              | 0.50      | 0.92 |
| 62                                                                         | Kh-7-17      | 34.75 | 22.15 | 42.95 | 0.09 | 0.02 | bdl  | 0.04  | 0.15                              | 0.49      | 0.83 |
| 63                                                                         | Kh-7-17      | 34.63 | 22.24 | 43.02 | 0.06 | 0.01 | bdl  | 0.04  | 0.11                              | 0.49      | 0.83 |
| 64                                                                         | Kh-7-17      | 34.45 | 21.32 | 44.14 | 0.03 | 0.01 | bdl  | 0.04  | 0.08                              | 0.49      | 0.89 |
| 65                                                                         | Kh-7-17      | 34.54 | 22.38 | 42.99 | 0.05 | bdl  | bdl  | 0.04  | 0.09                              | 0.49      | 0.82 |
| 66                                                                         | Kh-7-17      | 34.21 | 22.02 | 43.38 | 0.10 | 0.22 | bdl  | 0.07  | 0.39                              | 0.48      | 0.84 |
| 67                                                                         | Kh-7-17      | 34.60 | 22.08 | 43.24 | 0.06 | 0.01 | 0.01 | 0.01  | 0.09                              | 0.49      | 0.84 |
| 68                                                                         | Kh-7-17      | 34.26 | 21.90 | 43.72 | 0.06 | 0.02 | bdl  | 0.03  | 0.11                              | 0.48      | 0.85 |
| 69                                                                         | Kh-7-17      | 35.49 | 26.09 | 38.27 | 0.07 | 0.01 | bdl  | 0.07  | 0.15                              | 0.48      | 0.63 |
| 70                                                                         | Kh-7-17      | 34.25 | 21.72 | 43.92 | 0.04 | bdl  | 0.01 | 0.08  | 0.13                              | 0.49      | 0.87 |
| 71                                                                         | Kh-7-17      | 34.60 | 22.28 | 42.91 | 0.04 | bdl  | bdl  | 0.16  | 0.21                              | 0.49      | 0.82 |
| 72                                                                         | Kh-7-17      | 34.57 | 22.18 | 43.16 | 0.04 | bdl  | bdl  | 0.04  | 0.09                              | 0.49      | 0.83 |
| 73                                                                         | Kh-7-17      | 34.76 | 22.80 | 42.26 | 0.06 | 0.03 | bdl  | 0.09  | 0.18                              | 0.49      | 0.79 |
| <b>Hydrothermal Apy1 of the of intrusion-hosted orogenic gold deposits</b> |              |       |       |       |      |      |      |       |                                   |           |      |
| <i>Deposit V'yun, dikes, n=22</i>                                          |              |       |       |       |      |      |      |       |                                   |           |      |
| 74                                                                         | V-21-18 1_1  | 34.42 | 20.83 | 44.23 | 0.06 | 0.07 | 0.01 | 0.90  | 1.04                              | 0.50      | 0.91 |
| 75                                                                         | V-21-18 1_2  | 34.03 | 20.63 | 43.62 | 0.02 | 0.06 | bdl  | 0.97  | 1.03                              | 0.50      | 0.91 |
| 76                                                                         | V-21-18 1_3  | 34.13 | 21.59 | 44.69 | bdl  | bdl  | bdl  | 0.06  | 0.06                              | 0.48      | 0.89 |
| 77                                                                         | V-21-18 1_4  | 34.92 | 21.69 | 44.86 | bdl  | bdl  | 0.03 | 0.10  | 0.13                              | 0.49      | 0.89 |
| 78                                                                         | V-21-18 1_5  | 34.15 | 20.86 | 45.71 | bdl  | 0.03 | bdl  | 0.16  | 0.19                              | 0.49      | 0.94 |
| 79                                                                         | V-21-18 1_6  | 34.26 | 20.87 | 44.94 | 0.03 | 0.02 | 0.01 | 0.20  | 0.26                              | 0.49      | 0.92 |
| 80                                                                         | V-21-18 2_1  | 34.31 | 20.86 | 45.04 | bdl  | bdl  | 0.01 | 0.24  | 0.25                              | 0.49      | 0.92 |
| 81                                                                         | V-21-18 2_2  | 33.84 | 20.85 | 44.60 | bdl  | bdl  | bdl  | 0.841 | 0.841                             | 0.49      | 0.92 |
| 82                                                                         | V-21-18 2_3  | 34.21 | 21.74 | 43.34 | bdl  | bdl  | bdl  | 1.63  | 1.63                              | 0.49      | 0.85 |
| 83                                                                         | V-21-18 2_4  | 34.26 | 20.97 | 44.94 | 0.01 | bdl  | 0.02 | 0.34  | 0.37                              | 0.49      | 0.92 |
| 84                                                                         | V-21-18 2_5  | 33.86 | 20.98 | 45.61 | bdl  | bdl  | bdl  | 0.32  | 0.32                              | 0.48      | 0.93 |
| <i>Deposit Shumnyi, dikes, n=22</i>                                        |              |       |       |       |      |      |      |       |                                   |           |      |
| 85                                                                         | S-113-18 1_1 | 34.59 | 21.02 | 43.95 | bdl  | 0.01 | 0.03 | 0.2   | 0.24                              | 0.5       | 0.9  |
| 86                                                                         | S-113-18 1_2 | 35.32 | 21.27 | 43.36 | bdl  | bdl  | bdl  | 0.06  | 0.06                              | 0.51      | 0.87 |
| 87                                                                         | S-113-18 1_3 | 35.57 | 23.31 | 41.00 | 0.01 | bdl  | bdl  | 1.80  | 1.81                              | 0.5       | 0.75 |

supplementary materials (continued)

| №                                                          | Sample       | Fe    | S     | As    | Co   | Ni   | Cu   | Sb   | Σ content<br>of trace<br>elements | Fe/(S+As) | As/S |
|------------------------------------------------------------|--------------|-------|-------|-------|------|------|------|------|-----------------------------------|-----------|------|
| 88                                                         | S-113-18 1_4 | 35.06 | 21.28 | 43.32 | 0.04 | bdl  | bdl  | 0.08 | 0.12                              | 0.51      | 0.87 |
| 89                                                         | S-113-18 1_5 | 34.95 | 21.2  | 44.48 | bdl  | bdl  | 0.01 | 0.16 | 0.17                              | 0.50      | 0.90 |
| 90                                                         | S-113-18 2_1 | 34.93 | 20.89 | 43.86 | bdl  | bdl  | 0.03 | 0.22 | 0.25                              | 0.51      | 0.90 |
| 91                                                         | S-113-18 2_2 | 35.24 | 20.78 | 44.03 | bdl  | bdl  | bdl  | 0.19 | 0.19                              | 0.51      | 0.91 |
| 92                                                         | S-113-18 2_3 | 35.37 | 21.56 | 43.43 | bdl  | bdl  | bdl  | 0.53 | 0.53                              | 0.50      | 0.86 |
| 93                                                         | S-113-18 2_4 | 34.66 | 20.9  | 44.70 | 0.02 | bdl  | bdl  | 0.37 | 0.39                              | 0.51      | 0.92 |
| 94                                                         | S-113-18 2_5 | 34.99 | 21.08 | 43.91 | bdl  | bdl  | 0.03 | 0.14 | 0.17                              | 0.50      | 0.89 |
| 95                                                         | S-113-18 2_5 | 34.99 | 21.08 | 43.91 | bdl  | bdl  | 0.03 | 0.14 | 0.17                              | 0.50      | 0.89 |
| <i>Deposit V'yun, sandstones in dike exocontacts, n=10</i> |              |       |       |       |      |      |      |      |                                   |           |      |
| 96                                                         | V-162-18     | 35.05 | 21.4  | 43.46 | bdl  | 0.07 | bdl  | 0.03 | 0.10                              | 0.50      | 0.87 |
| 97                                                         | V-162-18     | 35.15 | 21.37 | 43.43 | bdl  | 0.01 | bdl  | 0.03 | 0.04                              | 0.51      | 0.87 |
| 98                                                         | V-162-18     | 35.74 | 22.78 | 40.98 | bdl  | 0.02 | bdl  | 0.48 | 0.50                              | 0.51      | 0.77 |
| 99                                                         | V-162-18     | 35    | 21.25 | 43.59 | bdl  | 0.08 | 0.03 | 0.06 | 0.17                              | 0.5       | 0.88 |
| 100                                                        | V-162-18     | 35.27 | 21.07 | 43.61 | bdl  | 0.01 | bdl  | 0.04 | 0.05                              | 0.51      | 0.89 |
| 101                                                        | V-162-18     | 34.91 | 21.49 | 43.54 | bdl  | bdl  | 0.01 | 0.05 | 0.06                              | 0.50      | 0.87 |
| 102                                                        | V-162-18     | 35.73 | 22.27 | 41.56 | bdl  | bdl  | bdl  | 0.44 | 0.44                              | 0.51      | 0.8  |
| 103                                                        | V-162-18     | 35.36 | 21.46 | 42.86 | bdl  | 0.01 | 0.02 | 0.29 | 0.312                             | 0.51      | 0.85 |
| 104                                                        | V-162-18     | 35.69 | 21.76 | 42.48 | bdl  | bdl  | bdl  | 0.07 | 0.07                              | 0.51      | 0.84 |
| 105                                                        | V-162-18     | 35.2  | 21.65 | 43.07 | bdl  | bdl  | bdl  | 0.09 | 0.09                              | 0.50      | 0.85 |
