# Supplementary material for: Origin of Disseminated Gold-Sulfide Mineralization from Proximal Alteration in Orogenic Gold Deposits in the Central Sector of the Yana–Kolyma Metallogenic Belt, NE Russia
Source: MDPI journal article supplement (doi:10.3390/min13030394), 2023-03-11
Supplement: s1 [file s1]

**Supplementary Table S1.**

**Compositions (wt%) for pyrite in the proximal alteration rock OGD Central YKMB, analyzed by EPMA.**

| №                              | Sample     | Fe    | S     | As   | Co   | Ni   | Cu   | Sb   | Pb  | Σ content of   |       |           |      |
|--------------------------------|------------|-------|-------|------|------|------|------|------|-----|----------------|-------|-----------|------|
|                                |            |       |       |      |      |      |      |      |     | trace elements | Ni/Co | Fe/(S+As) | S/Fe |
| Metamorphic (Py2) pyrite, n=38 |            |       |       |      |      |      |      |      |     |                |       |           |      |
| 1                              | S-141-18   | 45.95 | 53.92 | 0.02 | 0.01 | 0.05 | 0.03 | bdl* | bdl | 0.11           | 5.0   | 0.49      | 2.04 |
| 2                              | VZh-19-18  | 47.27 | 52.67 | bdl  | 0.03 | 0.03 | bdl  | 0.01 | bdl | 0.07           | 1.0   | 0.52      | 1.94 |
| 3                              | VZh-19-18  | 47.13 | 52.77 | bdl  | 0.01 | 0.05 | bdl  | 0.03 | bdl | 0.10           | 4.5   | 0.51      | 1.95 |
| 4                              | VZh-106-18 | 46.48 | 53.45 | bdl  | 0.03 | 0.02 | 0.02 | bdl  | bdl | 0.07           | 0.6   | 0.50      | 2.00 |
| 5                              | VZh-158-18 | 46.06 | 53.88 | bdl  | 0.01 | bdl  | bdl  | 0.04 | bdl | 0.06           | -     | 0.49      | 2.04 |
| 6                              | VZh-29-18  | 46.19 | 53.74 | bdl  | 0.04 | bdl  | bdl  | 0.02 | bdl | 0.06           | -     | 0.49      | 2.03 |
| 7                              | VZh-29-18  | 46.26 | 53.73 | bdl  | 0.01 | bdl  | bdl  | bdl  | bdl | 0.01           | -     | 0.49      | 2.02 |
| 8                              | VZh-29-18  | 46.56 | 53.26 | 0.11 | 0.02 | 0.05 | bdl  | 0.01 | bdl | 0.18           | 2.6   | 0.50      | 1.99 |
| 9                              | VK-83-18   | 46.62 | 53.05 | bdl  | 0.22 | 0.08 | 0.02 | 0.02 | bdl | 0.34           | 0.3   | 0.50      | 1.98 |
| 10                             | VK-83-18   | 45.72 | 53.79 | 0.23 | 0.15 | 0.10 | bdl  | bdl  | bdl | 0.49           | 0.7   | 0.49      | 2.05 |
| 11                             | Kh-40-14   | 46.38 | 53.49 | 0.06 | 0.05 | 0.02 | bdl  | 0.01 | bdl | 0.14           | 0.4   | 0.50      | 2.01 |
| 12                             | Kh-55-14   | 46.55 | 52.92 | 0.31 | 0.07 | 0.04 | 0.04 | 0.06 | bdl | 0.53           | 0.6   | 0.50      | 1.98 |
| 13                             | Kh-55-14   | 46.61 | 53.09 | bdl  | 0.07 | 0.13 | 0.06 | 0.04 | bdl | 0.30           | 1.8   | 0.50      | 1.98 |
| 14                             | Kh-55-14   | 46.98 | 52.82 | bdl  | 0.07 | 0.05 | 0.05 | 0.04 | bdl | 0.20           | 0.8   | 0.51      | 1.96 |
| 15                             | Kh-7-17    | 46.38 | 53.30 | 0.12 | 0.10 | 0.05 | 0.01 | 0.06 | bdl | 0.33           | 0.5   | 0.50      | 2.00 |
| 16                             | Kh-7-17    | 46.06 | 53.63 | 0.08 | 0.11 | 0.06 | 0.01 | 0.06 | bdl | 0.31           | 0.6   | 0.49      | 2.03 |
| 17                             | Kh-7-17    | 46.63 | 53.11 | 0.07 | 0.10 | 0.05 | bdl  | 0.04 | bdl | 0.26           | 0.5   | 0.50      | 1.98 |
| 18                             | Kh-7-17    | 46.91 | 52.92 | 0.04 | 0.02 | 0.07 | 0.04 | bdl  | bdl | 0.17           | 3.5   | 0.51      | 1.96 |
| 19                             | Kh-7-17    | 46.75 | 53.03 | 0.21 | bdl  | 0.01 | bdl  | bdl  | bdl | 0.22           |       | 0.51      | 1.98 |
| 20                             | Kh-55-14   | 46.80 | 52.70 | 0.27 | 0.09 | 0.07 | 0.03 | 0.03 | bdl | 0.50           | 0.7   | 0.51      | 1.96 |
| 21                             | Kh-55-14   | 46.56 | 52.88 | 0.32 | 0.09 | 0.14 | bdl  | 0.01 | bdl | 0.57           | 1.5   | 0.50      | 1.98 |
| 22                             | Kh-4-17    | 46.62 | 53.02 | 0.25 | 0.06 | 0.01 | 0.01 | 0.02 | bdl | 0.36           | 0.2   | 0.50      | 1.98 |
| 23                             | C-220A 1   | 46.54 | 53.29 | 0.06 | 0.06 | 0.01 | 0.05 | bdl  | bdl | 0.17           | 0.1   | 0.50      | 1.99 |
| 24                             | C-220A 1   | 46.34 | 53.55 | bdl  | 0.04 | bdl  | 0.06 | bdl  | bdl | 0.11           | -     | 0.50      | 2.01 |
| 25                             | C-220A 1   | 46.83 | 53.10 | bdl  | 0.05 | 0.02 | bdl  | bdl  | bdl | 0.08           | 0.4   | 0.51      | 1.97 |
| 26                             | YA-32-2    | 45.80 | 54.09 | bdl  | 0.05 | 0.05 | bdl  | bdl  | bdl | 0.11           | 1.0   | 0.49      | 2.06 |
| 27                             | YA-32-2    | 46.07 | 53.84 | bdl  | 0.05 | 0.04 | bdl  | bdl  | bdl | 0.09           | 0.7   | 0.49      | 2.04 |
| 28                             | YA-32-2    | 46.25 | 53.55 | 0.13 | 0.05 | bdl  | 0.01 | bdl  | bdl | 0.20           | -     | 0.50      | 2.02 |
| 29                             | YA-32-2    | 46.86 | 53.02 | bdl  | 0.06 | 0.05 | bdl  | bdl  | bdl | 0.11           | 0.8   | 0.49      | 1.97 |
| 30                             | YA-32-2    | 46.72 | 53.22 | bdl  | 0.04 | 0.01 | bdl  | bdl  | bdl | 0.06           | 0.3   | 0.52      | 1.98 |

supplementary materials (continued)

| №                                                                        | Sample   | Fe    | S     | As   | Co   | Ni   | Cu   | Sb  | Pb  | Σ content of   |       |           |      |
|--------------------------------------------------------------------------|----------|-------|-------|------|------|------|------|-----|-----|----------------|-------|-----------|------|
|                                                                          |          |       |       |      |      |      |      |     |     | trace elements | Ni/Co | Fe/(S+As) | S/Fe |
| 31                                                                       | MT-171   | 46.57 | 53.33 | bdl  | 0.07 | 0.04 | bdl  | bdl | bdl | 0.103          | 0.6   | 0.49      | 1.99 |
| 32                                                                       | MT-87-2  | 46.15 | 53.72 | 0.04 | 0.06 | 0.03 | bdl  | bdl | bdl | 0.13           | 0.4   | 0.51      | 2.03 |
| 33                                                                       | MT-87-2  | 47.29 | 52.64 | bdl  | 0.04 | 0.03 | bdl  | bdl | bdl | 0.07           | 0.7   | 0.50      | 1.94 |
| 34                                                                       | MT-171   | 46.54 | 53.30 | bdl  | 0.04 | 0.10 | 0.02 | bdl | bdl | 0.158          | 2.7   | 0.52      | 1.99 |
| 35                                                                       | MT-171   | 46.99 | 52.98 | bdl  | 0.02 | 0.01 | bdl  | bdl | bdl | 0.030          | 0.7   | 0.50      | 1.96 |
| 36                                                                       | MT-97-2  | 46.32 | 53.61 | bdl  | 0.07 | 0.01 | bdl  | bdl | bdl | 0.077          | 0.1   | 0.50      | 2.02 |
| 37                                                                       | MT-97-2  | 46.30 | 53.59 | 0.05 | 0.05 | bdl  | 0.01 | bdl | bdl | 0.106          | -     | 0.51      | 2.02 |
| 38                                                                       | MT-97-2  | 46.51 | 53.36 | 0.02 | 0.07 | 0.03 | 0.02 | bdl | bdl | 0.131          | 0.4   | 0.50      | 2.00 |
| <b>Hydrothermal Py3 of the of sediment-hosted orogenic gold deposits</b> |          |       |       |      |      |      |      |     |     |                |       |           |      |
| <i>Deposit Malo-Taryn, n=23</i>                                          |          |       |       |      |      |      |      |     |     |                |       |           |      |
| 41                                                                       | MT-76-22 | 46.67 | 52.68 | 0.58 | 0.06 | bdl  | bdl  | bdl | bdl | 0.64           | -     | 0.51      | 1.97 |
| 42                                                                       | MT-76-22 | 46.00 | 53.05 | 0.91 | 0.03 | 0.01 | 0.00 | bdl | bdl | 0.95           | 0.4   | 0.49      | 2.01 |
| 43                                                                       | MT-76-22 | 46.32 | 52.67 | 0.95 | 0.05 | 0.01 | bdl  | bdl | bdl | 1.01           | 0.1   | 0.50      | 1.98 |
| 44                                                                       | MT-76-22 | 46.58 | 53.05 | 0.31 | 0.06 | bdl  | bdl  | bdl | bdl | 0.37           | -     | 0.50      | 1.98 |
| 45                                                                       | MT-76-22 | 46.53 | 53.05 | 0.33 | 0.07 | 0.02 | bdl  | bdl | bdl | 0.42           | 0.3   | 0.50      | 1.99 |
| 46                                                                       | MT-76-22 | 46.11 | 53.56 | 0.31 | 0.02 | 0.00 | 0.00 | bdl | bdl | 0.33           | 0.3   | 0.49      | 2.02 |
| 47                                                                       | MT-76-22 | 45.88 | 53.66 | 0.38 | 0.08 | bdl  | bdl  | bdl | bdl | 0.46           | -     | 0.49      | 2.04 |
| 48                                                                       | MT-13-20 | 46.55 | 53.04 | 0.36 | 0.04 | 0.01 | bdl  | bdl | bdl | 0.41           | 0.2   | 0.50      | 1.98 |
| 49                                                                       | MT-13-20 | 46.14 | 53.43 | 0.35 | 0.08 | bdl  | 0.01 | bdl | bdl | 0.43           | -     | 0.49      | 2.02 |
| 50                                                                       | MT-13-20 | 45.61 | 53.73 | 0.63 | 0.03 | bdl  | bdl  | bdl | bdl | 0.66           | -     | 0.49      | 2.05 |
| 51                                                                       | MT-13-20 | 46.66 | 53.25 | 0.05 | 0.04 | bdl  | bdl  | bdl | bdl | 0.09           | -     | 0.52      | 1.99 |
| 52                                                                       | MT-86-22 | 47.66 | 51.24 | 1.06 | 0.04 | bdl  | 0.02 | bdl | bdl | 1.11           | -     | 0.51      | 1.87 |
| 53                                                                       | MT-86-22 | 46.85 | 51.61 | 1.46 | 0.05 | bdl  | 0.02 | bdl | bdl | 1.52           | -     | 0.50      | 1.92 |
| 54                                                                       | MT-86-22 | 46.98 | 51.75 | 1.20 | 0.03 | bdl  | 0.04 | bdl | bdl | 1.27           | -     | 0.50      | 1.92 |
| 55                                                                       | MT-86-22 | 46.11 | 52.57 | 1.22 | 0.04 | 0.03 | 0.03 | bdl | bdl | 1.32           | 0.8   | 0.50      | 1.99 |
| 56                                                                       | MT-86-22 | 46.64 | 52.05 | 1.24 | 0.04 | bdl  | 0.04 | bdl | bdl | 1.32           | -     | 0.51      | 1.94 |
| 57                                                                       | MT-86-22 | 46.15 | 52.41 | 1.36 | 0.05 | bdl  | 0.03 | bdl | bdl | 1.44           | -     | 0.49      | 1.98 |
| 58                                                                       | MT-86-22 | 46.41 | 52.35 | 1.14 | 0.02 | 0.02 | 0.07 | bdl | bdl | 1.24           | 0.8   | 0.50      | 1.96 |
| 59                                                                       | MT-86-22 | 46.21 | 52.40 | 1.31 | 0.05 | 0.00 | 0.02 | bdl | bdl | 1.39           | 0.1   | 0.50      | 1.97 |
| 60                                                                       | MT-86-22 | 46.20 | 53.01 | 0.70 | 0.07 | bdl  | 0.03 | bdl | bdl | 0.80           | -     | 0.50      | 2.00 |
| 61                                                                       | MT-86-22 | 45.97 | 52.98 | 0.98 | 0.05 | bdl  | 0.03 | bdl | bdl | 1.05           | -     | 0.49      | 2.01 |
| 62                                                                       | YAP-14-1 | 46.81 | 52.80 | 0.32 | 0.03 | 0.02 | 0.02 | bdl | bdl | 0.39           | 0.8   | 0.49      | 1.96 |

supplementary materials (continued)

| №                    | Sample    | Fe    | S     | As   | Co   | Ni   | Cu  | Sb   | Pb  | Σ content of      | Ni/Co | Fe/(S+As) | S/Fe |
|----------------------|-----------|-------|-------|------|------|------|-----|------|-----|-------------------|-------|-----------|------|
|                      |           |       |       |      |      |      |     |      |     | trace<br>elements |       |           |      |
| Deposit Badran, n=60 |           |       |       |      |      |      |     |      |     |                   |       |           |      |
| 63                   | YAP-14-1  | 46.71 | 52.86 | 0.36 | 0.07 | bdl  | bdl | bdl  | bdl | 0.43              | -     | 0.49      | 1.97 |
| 64                   | B-10/1-19 | 45.40 | 51.87 | 2.18 | 0.16 | 0.27 | bdl | 0.11 | bdl | 2.73              | 1.8   | 0.49      | 1.99 |
| 65                   | B-10/1-19 | 45.92 | 52.40 | 1.62 | 0.03 | bdl  | bdl | 0.03 | bdl | 1.69              | -     | 0.50      | 1.99 |
| 66                   | B-10/1-19 | 45.96 | 52.55 | 1.48 | 0.01 | bdl  | bdl | bdl  | bdl | 1.49              | -     | 0.50      | 1.99 |
| 67                   | B-10/1-19 | 45.97 | 51.82 | 2.16 | 0.04 | bdl  | bdl | 0.01 | bdl | 2.21              | -     | 0.50      | 1.96 |
| 68                   | B-14/1-19 | 46.07 | 52.81 | 1.00 | 0.04 | bdl  | bdl | 0.08 | bdl | 1.12              | -     | 0.50      | 2.00 |
| 69                   | B-14/1-19 | 46.09 | 51.65 | 2.12 | 0.04 | bdl  | bdl | 0.09 | bdl | 2.26              | -     | 0.50      | 1.95 |
| 70                   | B-14/1-19 | 46.73 | 51.97 | 1.12 | 0.04 | bdl  | bdl | 0.13 | bdl | 1.30              | -     | 0.51      | 1.94 |
| 71                   | B-14/1-19 | 46.42 | 52.09 | 1.31 | 0.06 | bdl  | bdl | 0.11 | bdl | 1.49              | -     | 0.51      | 1.95 |
| 72                   | B-17-19   | 46.33 | 52.84 | 0.74 | 0.05 | bdl  | bdl | 0.04 | bdl | 0.83              | -     | 0.50      | 1.99 |
| 73                   | B-17-19   | 45.71 | 52.71 | 1.36 | 0.03 | bdl  | bdl | 0.18 | bdl | 1.58              | -     | 0.49      | 2.01 |
| 74                   | B-17-19   | 45.96 | 52.40 | 1.56 | 0.04 | bdl  | bdl | 0.05 | bdl | 1.64              | -     | 0.50      | 1.99 |
| 75                   | B-17-19   | 46.27 | 52.92 | 0.64 | 0.05 | bdl  | bdl | 0.13 | bdl | 0.81              | -     | 0.50      | 1.99 |
| 76                   | B-17-19   | 46.20 | 53.49 | 0.18 | 0.02 | bdl  | bdl | 0.11 | bdl | 0.32              | -     | 0.50      | 2.02 |
| 77                   | B-17-19   | 46.43 | 52.71 | 0.66 | 0.05 | bdl  | bdl | 0.15 | bdl | 0.86              | -     | 0.49      | 1.98 |
| 78                   | B-17-19   | 45.40 | 52.16 | 2.24 | 0.04 | bdl  | bdl | 0.17 | bdl | 2.45              | -     | 0.49      | 2.00 |
| 79                   | B-17-19   | 45.56 | 52.84 | 1.37 | 0.02 | bdl  | bdl | 0.21 | bdl | 1.60              | -     | 0.50      | 2.02 |
| 80                   | B-24/1-19 | 45.50 | 52.89 | 1.56 | 0.05 | bdl  | bdl | bdl  | bdl | 1.61              | -     | 0.47      | 2.02 |
| 81                   | B-24/1-19 | 44.65 | 53.50 | 1.80 | 0.05 | bdl  | bdl | bdl  | bdl | 1.85              | -     | 0.49      | 2.09 |
| 82                   | B-24/1-19 | 45.74 | 52.93 | 1.22 | 0.05 | 0.01 | bdl | 0.05 | bdl | 1.33              | 0.1   | 0.48      | 2.02 |
| 83                   | B-24/1-19 | 45.11 | 53.82 | 1.01 | 0.02 | 0.01 | bdl | 0.04 | bdl | 1.08              | 0.5   | 0.49      | 2.08 |
| 84                   | B-24/1-19 | 45.85 | 53.10 | 0.98 | 0.04 | 0.02 | bdl | 0.01 | bdl | 1.05              | 0.4   | 0.50      | 2.02 |
| 85                   | B-24/1-19 | 46.13 | 52.84 | 0.98 | 0.02 | bdl  | bdl | 0.03 | bdl | 1.03              | -     | 0.49      | 1.99 |
| 86                   | B-24/1-19 | 45.52 | 53.32 | 1.11 | 0.03 | bdl  | bdl | 0.02 | bdl | 1.17              | -     | 0.50      | 2.04 |
| 87                   | B-41-19   | 46.17 | 53.00 | 0.76 | 0.04 | bdl  | bdl | 0.02 | bdl | 0.83              | 0.1   | 0.49      | 2.00 |
| 88                   | B-41-19   | 45.94 | 52.97 | 0.97 | 0.05 | 0.02 | bdl | 0.05 | bdl | 1.09              | 0.5   | 0.50      | 2.01 |
| 89                   | B-41-19   | 46.09 | 52.81 | 1.05 | 0.03 | 0.02 | bdl | bdl  | bdl | 1.10              | 0.7   | 0.49      | 2.00 |
| 90                   | B-41-19   | 46.09 | 53.48 | 0.33 | 0.06 | 0.02 | bdl | 0.03 | bdl | 0.44              | 0.4   | 0.49      | 2.02 |
| 91                   | B-46-19   | 45.72 | 52.66 | 1.56 | 0.05 | 0.02 | bdl | 0.01 | bdl | 1.63              | 0.3   | 0.49      | 2.01 |
| 92                   | B-46-19   | 45.36 | 52.24 | 2.27 | 0.07 | bdl  | bdl | 0.06 | bdl | 2.40              | -     | 0.49      | 2.01 |

supplementary materials (continued)

| №   | Sample    | Fe    | S     | As   | Co   | Ni   | Cu   | Sb   | Pb  | Σ content of   |       |           |      |
|-----|-----------|-------|-------|------|------|------|------|------|-----|----------------|-------|-----------|------|
|     |           |       |       |      |      |      |      |      |     | trace elements | Ni/Co | Fe/(S+As) | S/Fe |
| 93  | B-46-19   | 45.38 | 51.49 | 3.07 | 0.01 | 0.02 | bdl  | 0.03 | bdl | 3.14           | 1.7   | 0.49      | 1.98 |
| 94  | B-46-19   | 46.14 | 52.09 | 1.66 | 0.04 | 0.06 | bdl  | 0.01 | bdl | 1.77           | 1.7   | 0.50      | 1.97 |
| 95  | B-46-19   | 45.77 | 51.93 | 2.13 | 0.06 | 0.06 | bdl  | 0.05 | bdl | 2.30           | 1.1   | 0.50      | 1.98 |
| 96  | B-46-19   | 45.58 | 52.51 | 1.86 | 0.02 | bdl  | bdl  | 0.02 | bdl | 1.91           | -     | 0.49      | 2.01 |
| 97  | B-52-19   | 45.84 | 52.70 | 1.42 | 0.03 | bdl  | bdl  | 0.01 | bdl | 1.45           | -     | 0.49      | 2.00 |
| 98  | B-52-19   | 45.88 | 52.47 | 1.60 | 0.03 | bdl  | bdl  | 0.02 | bdl | 1.65           | -     | 0.50      | 1.99 |
| 99  | B-52-19   | 46.30 | 52.40 | 1.21 | 0.03 | 0.01 | bdl  | 0.04 | bdl | 1.29           | 0.5   | 0.50      | 1.97 |
| 100 | B-52-19   | 46.35 | 52.63 | 1.01 | 0.01 | bdl  | bdl  | bdl  | bdl | 1.03           | -     | 0.50      | 1.98 |
| 101 | B-52-19   | 46.02 | 53.18 | 0.67 | 0.04 | 0.06 | bdl  | 0.03 | bdl | 0.80           | 1.6   | 0.49      | 2.01 |
| 102 | B-52-19   | 46.56 | 52.20 | 1.20 | 0.03 | bdl  | bdl  | 0.01 | bdl | 1.24           | -     | 0.51      | 1.95 |
| 103 | B-52-19   | 46.09 | 52.28 | 1.50 | 0.07 | 0.07 | bdl  | bdl  | bdl | 1.63           | 1.0   | 0.50      | 1.98 |
| 104 | B-52-19   | 46.48 | 52.33 | 1.14 | 0.02 | bdl  | bdl  | 0.03 | bdl | 1.19           | -     | 0.51      | 1.96 |
| 105 | B-35/1-19 | 47.00 | 51.97 | 0.92 | 0.08 | bdl  | 0.03 | bdl  | bdl | 1.03           | -     | 0.52      | 1.93 |
| 106 | B-35/1-19 | 47.47 | 51.17 | 1.30 | 0.05 | bdl  | bdl  | 0.02 | bdl | 1.36           | -     | 0.53      | 1.88 |
| 107 | B-35/1-19 | 46.98 | 52.14 | 0.79 | 0.07 | bdl  | bdl  | 0.02 | bdl | 0.88           | -     | 0.51      | 1.93 |
| 108 | B-35/1-19 | 46.88 | 52.07 | 0.99 | 0.06 | bdl  | bdl  | bdl  | bdl | 1.05           | -     | 0.51      | 1.93 |
| 109 | B-51-19   | 46.67 | 52.19 | 1.10 | 0.04 | bdl  | bdl  | bdl  | bdl | 1.14           | -     | 0.51      | 1.95 |
| 110 | B-51-19   | 46.73 | 51.77 | 1.45 | 0.05 | bdl  | bdl  | bdl  | bdl | 1.50           | -     | 0.51      | 1.93 |
| 111 | B-54/1-19 | 46.69 | 52.23 | 1.03 | 0.05 | bdl  | bdl  | bdl  | bdl | 1.08           | -     | 0.51      | 1.95 |
| 112 | B-54/1-19 | 46.07 | 52.33 | 1.55 | 0.05 | bdl  | bdl  | bdl  | bdl | 1.60           | -     | 0.50      | 1.98 |
| 113 | B-54/1-19 | 46.88 | 51.74 | 1.28 | 0.06 | 0.02 | 0.02 | bdl  | bdl | 1.38           | 0.3   | 0.51      | 1.92 |
| 114 | B-54/1-19 | 46.17 | 52.42 | 1.31 | 0.06 | bdl  | bdl  | 0.03 | bdl | 1.40           | -     | 0.50      | 1.98 |
| 115 | B-54/1-19 | 47.41 | 51.30 | 1.17 | 0.06 | 0.06 | bdl  | bdl  | bdl | 1.29           | 0.9   | 0.53      | 1.88 |
| 116 | B-54/1-19 | 46.56 | 52.18 | 1.19 | 0.04 | bdl  | bdl  | 0.04 | bdl | 1.27           | -     | 0.51      | 1.95 |
| 117 | B-54/1-19 | 46.21 | 51.62 | 2.02 | 0.07 | 0.02 | 0.05 | 0.01 | bdl | 2.17           | 0.2   | 0.51      | 1.95 |
| 118 | B-54/1-19 | 47.50 | 51.42 | 0.94 | 0.07 | 0.07 | bdl  | bdl  | bdl | 1.08           | 1.1   | 0.53      | 1.89 |
| 119 | B-56/1-19 | 45.14 | 53.08 | 1.59 | 0.12 | 0.06 | 0.01 | 0.01 | bdl | 1.78           | 0.5   | 0.48      | 2.05 |
| 120 | B-56/1-19 | 45.99 | 52.15 | 1.65 | 0.09 | 0.10 | 0.02 | bdl  | bdl | 1.85           | 1.2   | 0.50      | 1.97 |
| 121 | B-56/1-19 | 45.14 | 53.08 | 1.59 | 0.12 | 0.06 | 0.01 | 0.01 | bdl | 1.78           | 0.5   | 0.48      | 2.05 |
| 122 | B-56/1-19 | 45.99 | 52.15 | 1.65 | 0.09 | 0.10 | 0.02 | bdl  | bdl | 1.85           | 1.2   | 0.50      | 1.97 |
| 123 | B-56/1-19 | 46.16 | 52.47 | 1.33 | 0.04 | bdl  | bdl  | 0.01 | bdl | 1.37           | -     | 0.50      | 1.98 |
| 124 | B-56/1-19 | 46.35 | 52.39 | 1.13 | 0.09 | 0.04 | bdl  | bdl  | bdl | 1.26           | 0.4   | 0.50      | 1.97 |

supplementary materials (continued)

| №                       | Sample    | Fe    | S     | As   | Co   | Ni   | Cu   | Sb   | Pb   | Σ content of   |       |           |      |
|-------------------------|-----------|-------|-------|------|------|------|------|------|------|----------------|-------|-----------|------|
|                         |           |       |       |      |      |      |      |      |      | trace elements | Ni/Co | Fe/(S+As) | S/Fe |
| Deposit Khangalas, n=47 |           |       |       |      |      |      |      |      |      |                |       |           |      |
| 125                     | Kh-32-14  | 46.23 | 52.01 | 1.70 | 0.05 | bdl  | bdl  | 0.01 | bdl  | 1.76           | -     | 0.50      | 1.96 |
| 126                     | Kh-51-14  | 46.48 | 52.21 | 1.21 | 0.09 | 0.01 | 0.01 | bdl  | bdl  | 1.32           | 0.1   | 0.51      | 1.96 |
| 127                     | Kh-51-14  | 46.36 | 51.79 | 1.65 | 0.12 | 0.06 | 0.02 | bdl  | bdl  | 1.85           | 0.5   | 0.51      | 1.95 |
| 126                     | Kh-51-14  | 46.60 | 51.88 | 1.41 | 0.11 | bdl  | bdl  | 0.01 | bdl  | 1.53           | 0.0   | 0.51      | 1.94 |
| 130                     | Kh-51-14  | 46.25 | 52.52 | 1.11 | 0.10 | 0.01 | 0.02 | bdl  | bdl  | 1.24           | 0.1   | 0.50      | 1.98 |
| 131                     | Kh-51-14  | 46.74 | 52.14 | 0.93 | 0.14 | 0.02 | 0.03 | bdl  | bdl  | 1.12           | 0.1   | 0.51      | 1.94 |
| 132                     | Kh-52-14  | 46.66 | 51.16 | 1.99 | 0.07 | 0.11 | 0.03 | bdl  | bdl  | 2.20           | 1.6   | 0.52      | 1.91 |
| 133                     | Kh-52-14  | 46.19 | 52.36 | 1.34 | 0.07 | 0.03 | 0.01 | bdl  | bdl  | 1.45           | 0.5   | 0.50      | 1.97 |
| 134                     | Kh-55-14  | 46.43 | 52.93 | 0.48 | 0.07 | 0.04 | 0.03 | 0.02 | bdl  | 0.65           | 0.6   | 0.50      | 1.99 |
| 135                     | Kh-55-14  | 46.47 | 52.40 | 1.00 | 0.07 | 0.01 | bdl  | 0.05 | bdl  | 1.13           | 0.2   | 0.51      | 1.96 |
| 136                     | Kh-55-14  | 46.81 | 52.03 | 0.80 | 0.22 | 0.10 | bdl  | 0.06 | bdl  | 1.17           | 0.4   | 0.51      | 1.94 |
| 137                     | Kh-55-14  | 46.99 | 51.99 | 0.88 | 0.06 | 0.03 | bdl  | 0.05 | bdl  | 1.02           | 0.4   | 0.52      | 1.93 |
| 138                     | Kh-61-14  | 45.93 | 53.08 | 0.83 | 0.05 | 0.04 | 0.02 | 0.05 | bdl  | 0.99           | 0.8   | 0.49      | 2.01 |
| 139                     | Kh-61-14  | 46.84 | 51.17 | 1.83 | 0.07 | 0.01 | 0.01 | 0.07 | bdl  | 1.99           | 0.2   | 0.52      | 1.90 |
| 140                     | Kh-9-17/1 | 46.00 | 52.92 | 0.93 | 0.07 | 0.02 | 0.02 | 0.04 | bdl  | 1.07           | 0.3   | 0.50      | 2.00 |
| 141                     | Kh-9-17/1 | 46.53 | 52.96 | 0.38 | 0.07 | 0.03 | 0.03 | 0.02 | bdl  | 0.52           | 0.4   | 0.50      | 1.98 |
| 142                     | Kh-9-17/1 | 45.99 | 52.47 | 1.40 | 0.08 | bdl  | 0.02 | 0.05 | bdl  | 1.54           | 0.0   | 0.50      | 1.99 |
| 143                     | Kh-9-17/1 | 46.05 | 53.27 | 0.57 | 0.06 | bdl  | 0.02 | 0.03 | bdl  | 0.68           | 0.0   | 0.49      | 2.01 |
| 144                     | Kh-4-17   | 46.61 | 52.70 | 0.60 | 0.04 | 0.03 | 0.02 | 0.01 | bdl  | 0.69           | 0.8   | 0.51      | 1.97 |
| 145                     | Kh-4-17   | 45.91 | 52.72 | 0.83 | 0.13 | 0.38 | 0.01 | 0.02 | bdl  | 1.37           | 2.8   | 0.50      | 2.00 |
| 146                     | Kh-35-17  | 47.11 | 52.06 | 0.71 | 0.06 | 0.03 | 0.01 | 0.02 | 0.01 | 0.83           | 0.5   | 0.52      | 1.92 |
| 147                     | Kh-35-17  | 46.67 | 52.65 | 0.51 | 0.06 | 0.01 | bdl  | 0.04 | 0.07 | 0.61           | 0.2   | 0.51      | 1.96 |
| 148                     | Kh-35-17  | 46.55 | 52.02 | 1.20 | 0.06 | 0.08 | bdl  | 0.05 | 0.04 | 1.39           | 1.4   | 0.51      | 1.95 |
| 149                     | Kh-35-17  | 46.72 | 51.70 | 1.33 | 0.06 | 0.08 | 0.01 | 0.03 | 0.07 | 1.51           | 1.2   | 0.51      | 1.93 |
| 150                     | KhG-12-19 | 46.43 | 53.05 | 0.32 | 0.04 | 0.02 | bdl  | 0.02 | 0.11 | 0.41           | 0.5   | 0.50      | 1.99 |
| 151                     | KhG-13-19 | 45.74 | 51.89 | 2.19 | 0.08 | 0.03 | 0.04 | 0.03 | 0.02 | 2.36           | 0.3   | 0.50      | 1.98 |
| 152                     | KhG-13-19 | 46.14 | 52.99 | 0.74 | 0.07 | 0.01 | 0.04 | 0.01 | bdl  | 0.87           | 0.1   | 0.50      | 2.00 |
| 153                     | KhG-13-19 | 46.64 | 52.09 | 1.13 | 0.07 | 0.02 | 0.03 | 0.02 | bdl  | 1.28           | 0.3   | 0.51      | 1.95 |
| 154                     | KhG-18-19 | 46.59 | 52.51 | 0.56 | 0.11 | 0.18 | bdl  | 0.05 | bdl  | 0.91           | 1.6   | 0.51      | 1.96 |
| 155                     | KhG-18-19 | 45.88 | 52.18 | 1.81 | 0.06 | bdl  | bdl  | 0.06 | bdl  | 1.93           | 0.0   | 0.50      | 1.98 |
| 156                     | KhG-29-19 | 46.25 | 52.92 | 0.59 | 0.05 | 0.01 | 0.06 | 0.03 | 0.08 | 0.74           | 0.3   | 0.50      | 1.99 |

supplementary materials (continued)

| №   | Sample     | Fe    | S     | As   | Co   | Ni   | Cu   | Sb   | Pb   | Σ content of   | Ni/Co | Fe/(S+As) | S/Fe |
|-----|------------|-------|-------|------|------|------|------|------|------|----------------|-------|-----------|------|
|     |            |       |       |      |      |      |      |      |      | trace elements |       |           |      |
| 157 | KhG-29-19  | 46.05 | 52.09 | 1.44 | 0.13 | 0.23 | 0.01 | 0.02 | 0.04 | 1.82           | 1.7   | 0.50      | 1.97 |
| 158 | KhG-29-19  | 46.36 | 51.79 | 1.74 | 0.04 | bdl  | 0.03 | 0.03 | 0.01 | 1.84           | 0.0   | 0.51      | 1.95 |
| 159 | KhG-30-19  | 46.70 | 52.51 | 0.64 | 0.05 | 0.03 | 0.03 | bdl  | 0.04 | 0.75           | 0.6   | 0.51      | 1.96 |
| 160 | KhG-30-19  | 46.47 | 52.68 | 0.59 | 0.05 | 0.13 | 0.01 | 0.02 | 0.05 | 0.80           | 2.4   | 0.50      | 1.97 |
| 161 | KhG-30-19  | 46.63 | 52.57 | 0.65 | 0.05 | 0.02 | 0.02 | 0.02 | 0.04 | 0.75           | 0.4   | 0.51      | 1.96 |
| 162 | KhG-30-19  | 46.92 | 52.41 | 0.51 | 0.04 | 0.05 | 0.01 | 0.02 | 0.04 | 0.63           | 1.1   | 0.51      | 1.95 |
| 163 | KhPr2-4-14 | 46.93 | 52.27 | 0.70 | 0.04 | bdl  | bdl  | 0.04 | 0.02 | 0.78           | 0.0   | 0.51      | 1.94 |
| 164 | KhPr2-4-14 | 46.92 | 52.31 | 0.71 | 0.06 | 0.01 | bdl  | bdl  | bdl  | 0.78           | 0.1   | 0.51      | 1.94 |
| 165 | KhPr2-4-14 | 46.93 | 52.07 | 0.94 | 0.04 | bdl  | bdl  | 0.03 | bdl  | 1.01           | -     | 0.51      | 1.93 |
| 166 | KhPr2-4-14 | 47.18 | 51.99 | 0.74 | 0.05 | bdl  | 0.02 | 0.01 | bdl  | 0.83           | -     | 0.52      | 1.92 |
| 167 | Khg-30-19  | 46.92 | 52.41 | 0.51 | 0.04 | 0.05 | 0.01 | 0.02 | 0.04 | 0.63           | 1.1   | 0.51      | 1.95 |
| 168 | Kh-7-17    | 46.58 | 52.14 | 1.23 | 0.02 | 0.01 | 0.01 | bdl  | bdl  | 1.28           | 0.4   | 0.51      | 1.95 |
| 169 | Kh-7-17    | 45.74 | 52.83 | 1.39 | 0.02 | 0.01 | 0.02 | bdl  | bdl  | 1.44           | 0.6   | 0.49      | 2.01 |
| 170 | Kh-7-17    | 45.98 | 52.18 | 1.84 | bdl  | bdl  | bdl  | bdl  | bdl  | 1.84           | -     | 0.50      | 1.98 |
| 171 | Kh-5-14/1  | 46.38 | 52.92 | 0.54 | 0.08 | 0.08 | bdl  | bdl  | bdl  | 0.70           | 0.9   | 0.50      | 1.99 |
| 172 | Kh-5-14/1  | 46.10 | 53.29 | 0.53 | 0.05 | 0.02 | 0.01 | bdl  | bdl  | 0.61           | 0.5   | 0.49      | 2.01 |

Hydrothermal Py3 of the of intrusion-hosted orogenic gold deposits

*Deposit V'yun, dikes, n=38*

|     |         |       |       |      |      |      |      |      |     |      |      |      |      |
|-----|---------|-------|-------|------|------|------|------|------|-----|------|------|------|------|
| 173 | B-21-18 | 46.83 | 52.18 | 1.10 | 0.02 | bdl  | bdl  | bdl  | bdl | 1.12 | 0.02 | 0.51 | 1.94 |
| 174 | B-21-18 | 46.31 | 52.19 | 1.26 | 0.01 | bdl  | 0.02 | bdl  | bdl | 1.29 | 0.03 | 0.50 | 1.96 |
| 175 | B-21-18 | 46.68 | 52.63 | 1.56 | 0.02 | bdl  | bdl  | bdl  | bdl | 1.58 | 0.02 | 0.50 | 1.96 |
| 176 | B-21-18 | 46.88 | 52.71 | 0.54 | bdl  | bdl  | bdl  | bdl  | bdl | 0.54 | -    | 0.51 | 1.96 |
| 177 | B-21-18 | 46.41 | 52.66 | 1.11 | bdl  | bdl  | 0.05 | bdl  | bdl | 1.16 | -    | 0.50 | 1.98 |
| 178 | B-21-18 | 46.67 | 52.26 | 1.09 | 0.03 | 0.01 | bdl  | bdl  | bdl | 1.13 | 0.33 | 0.51 | 1.95 |
| 179 | B-21-18 | 45.82 | 51.86 | 1.42 | 0.01 | 0.02 | 0.02 | bdl  | bdl | 1.47 | 0.05 | 0.50 | 1.97 |
| 180 | B-21-18 | 46.12 | 52.08 | 1.06 | bdl  | bdl  | bdl  | bdl  | bdl | 1.06 | -    | 0.50 | 1.98 |
| 181 | B-21-18 | 46.21 | 52.55 | 1.05 | bdl  | bdl  | bdl  | bdl  | bdl | 1.05 | -    | 0.50 | 1.98 |
| 182 | B-21-18 | 46.44 | 52.65 | 1.38 | 0.01 | bdl  | 0.02 | bdl  | bdl | 1.41 | -    | 0.51 | 1.94 |
| 183 | VF-39-1 | 46.74 | 52.58 | 1.03 | 0.05 | bdl  | bdl  | bdl  | bdl | 1.08 | -    | 0.50 | 1.96 |
| 184 | VF-39-1 | 46.89 | 53.14 | 0.21 | 0.07 | bdl  | bdl  | 0.08 | bdl | 0.28 | -    | 0.50 | 1.96 |
| 185 | VF-39-1 | 45.25 | 52.94 | 0.60 | 0.05 | bdl  | bdl  | 0.00 | bdl | 0.65 | -    | 0.51 | 1.96 |
| 186 | VF-39-1 | 46.88 | 53.01 | 0.13 | 0.03 | bdl  | 0.03 | 0.05 | bdl | 0.19 | -    | 0.50 | 1.98 |

supplementary materials (continued)

| №                                   | Sample     | Fe    | S     | As   | Co   | Ni   | Cu   | Sb   | Pb  | Σ content of   |       |           |      |
|-------------------------------------|------------|-------|-------|------|------|------|------|------|-----|----------------|-------|-----------|------|
|                                     |            |       |       |      |      |      |      |      |     | trace elements | Ni/Co | Fe/(S+As) | S/Fe |
| 187                                 | VF-39-1    | 47.16 | 53.11 | 0.63 | 0.06 | bdl  | bdl  | 0.02 | bdl | 0.68           | -     | 0.51      | 1.95 |
| 188                                 | VF-39-1    | 47.11 | 52.39 | 0.58 | 0.03 | 0.07 | bdl  | 0.02 | bdl | 0.63           | 3.20  | 0.50      | 1.97 |
| 189                                 | VF-39-1    | 46.42 | 53.04 | 0.76 | 0.08 | bdl  | bdl  | 0.04 | bdl | 0.86           | 0.30  | 0.50      | 1.97 |
| 190                                 | VF-39-1    | 46.4  | 53.76 | 0.16 | 0.05 | 0.02 | bdl  | 0.09 | bdl | 0.32           | 0.31  | 0.50      | 1.98 |
| 191                                 | BK-125-18  | 47.01 | 53.61 | bdl  | 0.07 | bdl  | bdl  | 0.04 | bdl | 0.11           | -     | 0.50      | 1.97 |
| 192                                 | BK-125-18  | 46.84 | 53.85 | bdl  | 0.03 | bdl  | bdl  | 0.02 | bdl | 0.05           | -     | 0.51      | 1.96 |
| 193                                 | BK-125-18  | 47.08 | 52.79 | bdl  | 0.04 | bdl  | bdl  | 0.01 | bdl | 0.05           | -     | 0.51      | 1.97 |
| 194                                 | BK-125-18  | 46.95 | 53.36 | bdl  | 0.11 | bdl  | bdl  | 0.02 | bdl | 0.13           | -     | 0.49      | 2.04 |
| 195                                 | BK-125-18  | 47.18 | 53.51 | bdl  | 0.03 | bdl  | bdl  | 0.05 | bdl | 0.08           | -     | 0.51      | 1.97 |
| 196                                 | BK-125-18  | 46.86 | 53.38 | bdl  | 0.07 | bdl  | 0.01 | 0.12 | bdl | 0.20           | -     | 0.51      | 1.96 |
| 197                                 | BK-125-18  | 47.15 | 53.53 | bdl  | 0.03 | bdl  | bdl  | 0.05 | bdl | 0.08           | -     | 0.51      | 1.94 |
| 198                                 | B-43-18    | 44.27 | 53.99 | 0.04 | 0.87 | 1.6  | 0.01 | 0.03 | bdl | 2.55           | 1.8   | 0.50      | 1.99 |
| 199                                 | B-43-18    | 46.33 | 54.08 | bdl  | 0.38 | bdl  | 0.02 | 0.11 | bdl | 0.51           | -     | 0.49      | 2.02 |
| 200                                 | B-43-18    | 46.75 | 53.76 | bdl  | 0.13 | bdl  | 0.04 | 0.06 | bdl | 0.23           | -     | 0.50      | 1.99 |
| 201                                 | B-43-18    | 47.00 | 53.79 | bdl  | 0.14 | bdl  | bdl  | 0.05 | bdl | 0.19           | -     | 0.50      | 2.00 |
| 202                                 | B-43-18    | 46.78 | 53.95 | bdl  | 0.10 | bdl  | 0.05 | 0.07 | bdl | 0.22           | -     | 0.51      | 1.95 |
| 203                                 | B-43-18    | 46.73 | 53.99 | bdl  | 0.10 | 0.06 | bdl  | 0.05 | bdl | 0.21           | -     | 0.51      | 1.98 |
| 204                                 | B-43-18    | 46.61 | 54.04 | bdl  | 0.08 | 0.02 | bdl  | 0.02 | bdl | 0.12           | -     | 0.51      | 1.98 |
| 205                                 | B-37-18    | 46.55 | 52.90 | bdl  | 0.04 | bdl  | 0.01 | bdl  | bdl | 0.05           | -     | 0.50      | 1.98 |
| 206                                 | B-37-18    | 46.10 | 52.05 | 2.07 | 0.02 | bdl  | bdl  | bdl  | bdl | 2.09           | -     | 0.51      | 1.98 |
| 207                                 | B-37-18    | 46.79 | 52.96 | bdl  | 0.04 | 0.07 | bdl  | bdl  | bdl | 0.11           | 1.8   | 0.47      | 2.12 |
| 208                                 | B-37-18    | 46.47 | 52.60 | bdl  | 0.04 | bdl  | bdl  | bdl  | bdl | 0.04           | -     | 0.49      | 2.03 |
| 209                                 | B-37-18    | 46.17 | 52.98 | bdl  | 0.11 | bdl  | bdl  | bdl  | bdl | 0.11           | -     | 0.50      | 2.00 |
| 210                                 | B-21-18    | 46.44 | 52.65 | 1.38 | 0.01 | bdl  | 0.02 | bdl  | bdl | 1.41           | -     | 0.50      | 1.99 |
| <i>Deposit Shumnyi, dikes, n=32</i> |            |       |       |      |      |      |      |      |     |                |       |           |      |
| 211                                 | S-113-18 1 | 47.16 | 53.24 | 0.33 | 0.01 | 0.01 | bdl  | bdl  | bdl | 0.35           | 1.0   | 0.51      | 1.97 |
| 212                                 | S-113-18 1 | 46.48 | 52.02 | 0.56 | 0.01 | bdl  | 0.09 | bdl  | bdl | 0.66           | -     | 0.51      | 1.95 |
| 213                                 | S-113-18 1 | 46.93 | 53.06 | 0.04 | 0.01 | bdl  | 0.07 | bdl  | bdl | 0.12           | -     | 0.51      | 1.97 |
| 214                                 | S-113-18 1 | 47.2  | 52.3  | 0.67 | 0.03 | bdl  | 0.03 | bdl  | bdl | 0.73           | -     | 0.52      | 1.93 |
| 215                                 | S-113-18 1 | 47.13 | 52.78 | bdl  | bdl  | bdl  | 0.02 | bdl  | bdl | 0.02           | -     | 0.51      | 1.95 |
| 216                                 | S-113-18 1 | 47.5  | 51.79 | 0.93 | bdl  | bdl  | bdl  | bdl  | bdl | 0.93           | -     | 0.52      | 1.90 |
| 217                                 | S-113-18 1 | 46.64 | 51.01 | 1.45 | bdl  | bdl  | bdl  | bdl  | bdl | 1.45           | -     | 0.52      | 1.90 |

supplementary materials (continued)

| №                                                          | Sample     | Fe    | S     | As   | Co   | Ni   | Cu   | Sb   | Pb  | Σ content of   |       |           |      |
|------------------------------------------------------------|------------|-------|-------|------|------|------|------|------|-----|----------------|-------|-----------|------|
|                                                            |            |       |       |      |      |      |      |      |     | trace elements | Ni/Co | Fe/(S+As) | S/Fe |
| 218                                                        | S-113-18 1 | 46.54 | 51.06 | 1.84 | bdl  | 0.03 | 0.02 | bdl  | bdl | 1.88           | -     | 0.52      | 1.91 |
| 219                                                        | S-113-18 1 | 46.63 | 53.25 | 0.24 | bdl  | bdl  | 0.03 | bdl  | bdl | 0.34           | -     | 0.50      | 1.99 |
| 220                                                        | S-113-18 1 | 46.76 | 52.8  | 0.56 | 0.01 | bdl  | bdl  | bdl  | bdl | 0.57           | -     | 0.51      | 1.97 |
| 221                                                        | SH-26-1    | 47.01 | 52.79 | 0.57 | 0.05 | bdl  | bdl  | 0.04 | bdl | 0.62           | -     | 0.51      | 1.96 |
| 222                                                        | SH-26-1    | 46.51 | 52.57 | 0.99 | 0.10 | 0.07 | 0.00 | 0.08 | bdl | 1.16           | 0.7   | 0.50      | 1.97 |
| 223                                                        | SH-26-1    | 46.06 | 52.14 | 2.02 | 0.06 | 0.04 | 0.01 | 0.02 | bdl | 2.15           | 0.6   | 0.50      | 1.97 |
| 224                                                        | SH-26-1    | 46.42 | 52.41 | 1.09 | 0.02 | bdl  | bdl  | 0.04 | bdl | 1.11           | -     | 0.50      | 1.97 |
| 225                                                        | SH-26-1    | 46.1  | 52.81 | 0.13 | 0.04 | bdl  | bdl  | 0.08 | bdl | 0.16           | -     | 0.50      | 1.99 |
| 226                                                        | SH-26-1    | 44.22 | 53.39 | bdl  | 0.44 | 1.77 | 0.11 | 0.08 | bdl | 2.31           | 4.1   | 0.48      | 2.10 |
| 227                                                        | SH-26-1    | 43.72 | 53.38 | bdl  | 0.18 | 3.52 | 0.03 | 0.10 | bdl | 3.73           | 19.1  | 0.47      | 2.13 |
| 228                                                        | SH-26-1    | 44.98 | 52.75 | bdl  | 0.63 | 0.56 | 0.86 | 0.07 | bdl | 2.06           | 0.9   | 0.49      | 2.04 |
| 229                                                        | SH-26-1    | 44.63 | 51.06 | 0.92 | 0.16 | 0.24 | 2.31 | 0.10 | bdl | 3.87           | 1.5   | 0.50      | 1.99 |
| 230                                                        | SH-75-1    | 46.73 | 52.44 | bdl  | 0.05 | 0.01 | bdl  | bdl  | bdl | 0.06           | 0.2   | 0.51      | 1.95 |
| 231                                                        | SH-75-1    | 46.5  | 52.55 | bdl  | 0.05 | 0.01 | bdl  | bdl  | bdl | 0.06           | 0.2   | 0.51      | 1.97 |
| 232                                                        | SH-75-1    | 46.12 | 53.25 | bdl  | 0.04 | bdl  | bdl  | bdl  | bdl | 0.04           | -     | 0.50      | 2.01 |
| 233                                                        | SH-75-1    | 46.66 | 52.34 | bdl  | 0.03 | bdl  | bdl  | bdl  | bdl | 0.03           | -     | 0.51      | 1.95 |
| 234                                                        | SH-75-1    | 46.54 | 52.76 | bdl  | 0.02 | bdl  | bdl  | bdl  | bdl | 0.02           | -     | 0.51      | 1.97 |
| 235                                                        | SH-75-1    | 46.78 | 52.39 | bdl  | 0.03 | bdl  | bdl  | bdl  | bdl | 0.03           | -     | 0.51      | 1.95 |
| 236                                                        | SH-75-1    | 45.47 | 52.79 | bdl  | 0.06 | bdl  | bdl  | bdl  | bdl | 0.06           | -     | 0.49      | 2.02 |
| 237                                                        | SH-36-1    | 46.15 | 52.82 | bdl  | 0.08 | 0.02 | bdl  | bdl  | bdl | 0.10           | 0.3   | 0.50      | 1.99 |
| 238                                                        | SH-36-1    | 46.28 | 52.99 | 0.47 | 0.05 | bdl  | bdl  | bdl  | bdl | 0.52           | -     | 0.50      | 1.99 |
| 239                                                        | SH-36-1    | 46.48 | 52.9  | bdl  | 0.06 | bdl  | bdl  | bdl  | bdl | 0.06           | -     | 0.50      | 1.98 |
| 240                                                        | SH-36-1    | 46.49 | 52.61 | 0.19 | 0.04 | bdl  | bdl  | bdl  | bdl | 0.23           | -     | 0.51      | 1.97 |
| 241                                                        | SH-36-1    | 46.46 | 52.98 | bdl  | 0.03 | bdl  | bdl  | bdl  | bdl | 0.03           | -     | 0.50      | 1.99 |
| <i>Deposit V'yun, sandstones in dike exocontacts, n=53</i> |            |       |       |      |      |      |      |      |     |                |       |           |      |
| 242                                                        | VK-12-18   | 45.46 | 52.18 | 2.14 | 0.06 | 0.13 | bdl  | 0.02 | bdl | 2.35           | 2.3   | 0.49      | 2.00 |
| 243                                                        | VK-12-18   | 46.25 | 53.43 | 0.30 | 0.01 | bdl  | 0.01 | bdl  | bdl | 0.32           | -     | 0.50      | 2.01 |
| 244                                                        | VK-12-18   | 45.8  | 51.74 | 2.39 | bdl  | 0.03 | 0.02 | 0.02 | bdl | 2.46           | -     | 0.50      | 1.97 |
| 245                                                        | VK-12-18   | 45.99 | 52.14 | 1.84 | bdl  | bdl  | 0.04 | bdl  | bdl | 1.87           | -     | 0.50      | 1.97 |
| 246                                                        | VK-12-18   | 45.99 | 51.91 | 2.09 | bdl  | bdl  | 0.01 | bdl  | bdl | 2.10           | -     | 0.50      | 1.97 |
| 247                                                        | VK-12-18   | 46.59 | 51.74 | 1.65 | 0.01 | 0.08 | 0.02 | bdl  | bdl | 1.68           | 8     | 0.51      | 1.93 |
| 248                                                        | VK-12-18   | 44.86 | 52.7  | 2.42 | bdl  | bdl  | 0.02 | bdl  | bdl | 2.44           | -     | 0.48      | 2.05 |



supplementary materials (continued)

| №   | Sample   | Fe    | S     | As   | Co   | Ni   | Cu   | Sb   | Pb  | Σ content of   |       |           |      |
|-----|----------|-------|-------|------|------|------|------|------|-----|----------------|-------|-----------|------|
|     |          |       |       |      |      |      |      |      |     | trace elements | Ni/Co | Fe/(S+As) | S/Fe |
| 249 | VK-12-18 | 45.81 | 51.92 | 2.25 | bdl  | 0.01 | 0.01 | 0.01 | bdl | 2.27           | -     | 0.50      | 1.97 |
| 250 | VK-12-18 | 45.52 | 52.03 | 2.32 | 0.01 | 0.12 | bdl  | bdl  | bdl | 2.46           | 11.8  | 0.49      | 1.99 |
| 251 | V-125-18 | 47.27 | 50.58 | 2.12 | bdl  | 0.02 | bdl  | 0.01 | bdl | 2.15           | -     | 0.53      | 1.86 |
| 252 | V-125-18 | 46.65 | 50.44 | 2.88 | 0.01 | 0.02 | 0.01 | bdl  | bdl | 2.91           | 2     | 0.52      | 1.88 |
| 253 | V-125-18 | 47.12 | 50.29 | 2.57 | 0.02 | 0.03 | bdl  | 0.01 | bdl | 2.63           | 1.3   | 0.53      | 1.86 |
| 254 | V-125-18 | 47.03 | 50.9  | 2.02 | bdl  | 0.02 | bdl  | 0.03 | bdl | 2.07           | -     | 0.52      | 1.88 |
| 255 | V-125-18 | 46.83 | 51.62 | 1.53 | bdl  | bdl  | bdl  | 0.02 | bdl | 1.55           | -     | 0.51      | 1.92 |
| 256 | V-125-18 | 46.48 | 50.05 | 3.16 | 0.05 | 0.24 | bdl  | 0.01 | bdl | 3.45           | 4.7   | 0.52      | 1.88 |
| 257 | V-125-18 | 46.81 | 50.78 | 2.36 | bdl  | bdl  | 0.04 | 0.02 | bdl | 2.41           | -     | 0.52      | 1.89 |
| 258 | V-98-18  | 47.4  | 52.03 | 0.54 | bdl  | bdl  | 0.01 | 0.02 | bdl | 0.57           | -     | 0.52      | 1.91 |
| 259 | V-98-18  | 47.21 | 52.36 | 0.43 | bdl  | bdl  | bdl  | 0.01 | bdl | 0.44           | -     | 0.52      | 1.93 |
| 260 | V-98-18  | 46.89 | 52.38 | 0.66 | bdl  | 0.01 | bdl  | 0.06 | bdl | 0.72           | -     | 0.51      | 1.95 |
| 261 | V-98-18  | 47.32 | 51.77 | 0.82 | bdl  | 0.03 | bdl  | 0.06 | bdl | 0.91           | -     | 0.52      | 1.91 |
| 262 | V-98-18  | 47.4  | 52.11 | 0.45 | bdl  | 0.03 | bdl  | bdl  | bdl | 0.49           | 2.3   | 0.52      | 2.00 |
| 263 | V-98-18  | 47.29 | 52.27 | 0.40 | 0.01 | 0.01 | 0.02 | bdl  | bdl | 0.44           | -     | 0.52      | 1.91 |
| 264 | V-98-18  | 47.02 | 52.36 | 0.61 | 0.02 | 0.01 | bdl  | bdl  | bdl | 0.62           | 0.5   | 0.51      | 1.92 |
| 265 | V-98-18  | 47.19 | 52.14 | 0.55 | 0.01 | 0.06 | 0.01 | 0.01 | bdl | 0.67           | 6     | 0.52      | 1.94 |
| 266 | V-98-18  | 47.22 | 52.12 | 0.64 | bdl  | bdl  | 0.01 | 0.01 | bdl | 0.66           | -     | 0.52      | 1.92 |
| 267 | V-98-18  | 47.37 | 51.94 | 0.67 | bdl  | bdl  | bdl  | 0.02 | bdl | 0.69           | -     | 0.52      | 1.92 |
| 268 | V-98-18  | 47    | 51.62 | 1.32 | bdl  | 0.01 | 0.02 | 0.03 | bdl | 1.38           | -     | 0.52      | 1.91 |
| 269 | V-98-18  | 47.57 | 52.11 | 0.31 | 0.01 | 0.02 | bdl  | bdl  | bdl | 0.32           | 2     | 0.52      | 1.91 |
| 270 | V-92-18  | 47.08 | 50.91 | 1.98 | bdl  | 0.01 | 0.01 | bdl  | bdl | 2.01           | -     | 0.52      | 1.91 |
| 271 | V-92-18  | 47.42 | 51.79 | 0.79 | bdl  | bdl  | bdl  | 0.00 | bdl | 0.79           | -     | 0.52      | 1.88 |
| 272 | V-92-18  | 47.17 | 50.26 | 2.57 | bdl  | 0.01 | 0.00 | bdl  | bdl | 2.57           | -     | 0.53      | 1.90 |
| 273 | V-92-18  | 47.36 | 50.77 | 1.84 | bdl  | bdl  | 0.02 | bdl  | bdl | 1.87           | -     | 0.53      | 1.86 |
| 274 | V-92-18  | 47.17 | 51.07 | 1.73 | 0.01 | 0.07 | 0.01 | bdl  | bdl | 1.76           | 7     | 0.52      | 1.87 |
| 275 | V-92-18  | 47.54 | 51.44 | 1.02 | 0.01 | bdl  | 0.00 | bdl  | bdl | 1.02           | -     | 0.53      | 1.89 |
| 276 | V-92-18  | 46.75 | 51.06 | 2.17 | bdl  | bdl  | 0.01 | 0.01 | bdl | 2.19           | -     | 0.52      | 1.88 |
| 277 | V-92-18  | 47.2  | 50.71 | 2.07 | bdl  | bdl  | 0.00 | 0.02 | bdl | 2.09           | -     | 0.53      | 1.90 |
| 278 | V-92-18  | 46.86 | 50.67 | 2.40 | bdl  | 0.01 | 0.01 | 0.05 | bdl | 2.47           | -     | 0.52      | 1.87 |
| 279 | V-92-18  | 46.84 | 51.25 | 1.90 | bdl  | bdl  | bdl  | bdl  | bdl | 1.90           | -     | 0.52      | 1.88 |
| 280 | V-86-18  | 46.53 | 52.51 | 0.90 | 0.02 | 0.01 | bdl  | 0.03 | bdl | 0.95           | 0.4   | 0.51      | 1.91 |

supplementary materials (continued)

| №   | Sample   | Fe    | S     | As   | Co   | Ni   | Cu   | Sb   | Pb  | Σ content of   |       |           |      |
|-----|----------|-------|-------|------|------|------|------|------|-----|----------------|-------|-----------|------|
|     |          |       |       |      |      |      |      |      |     | trace elements | Ni/Co | Fe/(S+As) | S/Fe |
| 281 | V-86-18  | 46.05 | 52.07 | 1.84 | bdl  | 0.00 | bdl  | 0.04 | bdl | 1.88           | -     | 0.50      | 1.97 |
| 282 | V-86-18  | 45.82 | 51.27 | 2.78 | bdl  | 0.13 | bdl  | bdl  | bdl | 2.90           | -     | 0.50      | 1.97 |
| 283 | V-86-18  | 46.42 | 52.48 | 1.07 | 0.01 | bdl  | 0.01 | 0.01 | bdl | 1.11           | -     | 0.50      | 1.95 |
| 284 | V-86-18  | 46.45 | 52.61 | 0.92 | bdl  | bdl  | bdl  | 0.01 | bdl | 0.93           | -     | 0.50      | 1.97 |
| 285 | V-86-18  | 46.52 | 52.95 | 0.51 | 0.01 | bdl  | bdl  | 0.01 | bdl | 0.53           | -     | 0.50      | 1.97 |
| 286 | V-86-18  | 45.82 | 51.32 | 2.84 | 0.01 | bdl  | bdl  | 0.00 | bdl | 2.86           | -     | 0.50      | 1.98 |
| 287 | S-69-18  | 45.87 | 52.62 | 1.34 | 0.02 | 0.15 | 0.00 | 0.02 | bdl | 1.52           | 0.8   | 0.50      | 1.96 |
| 288 | S-69-18  | 46.04 | 52.57 | 1.36 | 0.01 | 0.01 | 0.02 | bdl  | bdl | 1.39           | 1.0   | 0.50      | 2.01 |
| 289 | S-69-18  | 45.35 | 53.18 | 1.42 | 0.02 | 0.01 | 0.02 | bdl  | bdl | 1.47           | 0.5   | 0.48      | 2.00 |
| 290 | S-69-18  | 45.31 | 52.73 | 1.84 | 0.04 | 0.06 | 0.03 | bdl  | bdl | 1.96           | 1.5   | 0.49      | 1.97 |
| 299 | S-69-18  | 45.43 | 53.53 | 1.01 | 0.01 | 0.01 | bdl  | 0.01 | bdl | 1.04           | 1.0   | 0.48      | 2.04 |
| 300 | S-69-18  | 45.08 | 53.12 | 1.38 | 0.13 | 0.22 | 0.07 | bdl  | bdl | 1.80           | 1.7   | 0.48      | 1.99 |
| 301 | S-69-18  | 45.74 | 52.35 | 1.86 | 0.01 | bdl  | 0.02 | 0.02 | bdl | 1.89           | -     | 0.49      | 1.99 |
| 302 | S-69-18  | 45.91 | 52.39 | 1.63 | 0.03 | 0.02 | 0.03 | 0.00 | bdl | 1.71           | 0.7   | 0.50      | 1.99 |
| 303 | S-109-18 | 46.37 | 52.68 | 0.76 | 0.07 | 0.09 | 0.02 | 0.01 | bdl | 0.95           | 1.3   | 0.50      | 1.98 |
| 304 | S-109-18 | 46.18 | 52.76 | 0.86 | 0.07 | 0.13 | bdl  | 0.01 | bdl | 1.06           | 2     | 0.50      | 1.99 |
| 305 | S-109-18 | 46.68 | 52.94 | 0.33 | 0.03 | bdl  | 0.01 | bdl  | bdl | 0.37           | -     | 0.50      | 1.98 |
| 306 | S-109-18 | 46.16 | 52.79 | 0.97 | 0.04 | 0.03 | 0.01 | bdl  | bdl | 1.05           | 0.9   | 0.50      | 1.99 |
| 307 | S-109-18 | 46.35 | 52.38 | 1.18 | 0.04 | 0.05 | bdl  | 0.01 | bdl | 1.27           | 1.2   | 0.50      | 1.97 |
| 308 | S-109-18 | 46.44 | 52.68 | 0.81 | 0.04 | 0.02 | 0.01 | bdl  | bdl | 0.88           | 0.5   | 0.50      | 1.98 |
| 309 | S-109-18 | 45.9  | 53.28 | 0.79 | 0.02 | bdl  | 0.01 | bdl  | bdl | 0.82           | -     | 0.49      | 2.02 |
| 310 | S-109-18 | 46.21 | 52.59 | 1.16 | 0.04 | bdl  | bdl  | 0.00 | bdl | 1.20           | -     | 0.50      | 1.98 |
| 311 | S-109-18 | 46.62 | 53.02 | 0.31 | 0.05 | bdl  | bdl  | bdl  | bdl | 0.36           | -     | 0.50      | 1.98 |
| 312 | S-109-18 | 46.59 | 52.81 | 0.56 | 0.03 | bdl  | 0.01 | bdl  | bdl | 0.60           | -     | 0.50      | 1.97 |
| 313 | S-109-18 | 46.99 | 52.44 | 0.38 | 0.06 | 0.10 | 0.02 | 0.02 | bdl | 0.57           | 1.6   | 0.51      | 1.94 |
| 314 | S-109-18 | 46.1  | 52.48 | 1.34 | 0.04 | bdl  | bdl  | 0.04 | bdl | 1.42           | -     | 0.50      | 1.98 |
| 315 | BS-21/3  | 46.43 | 52.69 | 0.83 | 0.04 | 0.01 | bdl  | bdl  | bdl | 0.89           | 0.3   | 0.50      | 1.98 |
| 316 | BS-21/3  | 46.64 | 52.83 | 0.47 | 0.05 | bdl  | 0.01 | 0.01 | bdl | 0.54           | -     | 0.50      | 1.97 |
| 317 | BS-21/3  | 46.7  | 52.92 | 0.35 | 0.02 | bdl  | bdl  | 0.01 | bdl | 0.38           | -     | 0.51      | 1.97 |

bdl - concentration below detection limit.
